# Supplementary material for: Widespread surface waterpCO2 undersaturation during ice-melt season in an Arctic continental shelf sea (Hudson Bay, Canada)
Source: Oxford University Press journal article supplement (doi:10.1525/elementa.2020.00130), 2021-01-01
Supplement: ahmed_et_al._supplemental_material.docx [file ahmed_et_al._supplemental_material.docx]

**Supplemental material**

Widespread surface water *p*CO2 undersaturation during ice-melt season in an Arctic continental shelf sea (Hudson Bay, Canada)

Mohamed M. M. Ahmed1, 2*, Brent G. T. Else1, Brian Butterworth3, David W. Capelle4, Céline Guéguen5, Lisa A. Miller6, Claudie Meilleur5, Tim Papakyriakou4

1Geography Department, University of Calgary, Calgary, Alberta, Canada

2Geology Department, Beni-Suef University, Beni-Suef, Egypt

3Atmospheric and Oceanic Sciences Department, University of Wisconsin-Madison, Madison, USA

4Centre for Earth Observation Science, Department of Environment and Geography, University of Manitoba, Winnipeg, Manitoba, Canada

5Chemistry Department, Université de Sherbrooke, Sherbrooke, Quebec, Canada

6Centre for Ocean Climate Chemistry, Institute of Ocean Sciences, Fisheries and Oceans Canada, Sidney,

British Columbia, Canada

*Corresponding author: Mohamed Ahmed (email: mohamed.ahmed3@ucalgary.ca)

**List of Contents:**

**Figure S1. Sea-ice concentration from daily AMSR2 and weekly CISDA sea-ice products, and ship-recorded observations.** Sea-ice concentration (%) from daily AMSR2 products (blue), weekly CISDA sea-ice products (black), and *in situ* observations recorded by the ship officers (red circles).

**Figure S2. Regional maps of changes in sea-ice cover over time**. Sea-ice concentration (%, color-coded) at approximately the start (28 May), middle (18 June), and end (16 July) of our cruise in Hudson Bay. Sea-ice concentrations were provided by the Canadian Ice Service. Dates are year-month-day.

**Figure S3. Air temperature and sea–air CO2 gradient in Hudson Bay.** Spatial variability of (a) NARR air temperature, and (b) the measured sea–air gradient of CO2 partial pressure (∆*p*CO2) during our study time (25 May to 13 July 2018).

**Figure S4. Nitrate and SPAR variability in Hudson Bay.** Surface distribution of (a) nitrate (NO3) concentrations and (b) surface photosynthetic active radiation (SPAR) across Hudson Bay during our study. The dots indicate locations of CTD casts, and the white area represents sea-ice concentration greater than 90%, as of 9 July 2018, based on weekly ice charts provided by the Canadian Ice Service.

**Figure S5. *p*CO2 versus FDOM.** Scatterplot of *p*CO2 versus fluorescent dissolved organic matter (FDOM) in Hudson Bay during our study, with the measurements from the SW coast in red.

**Figure S6. CO2 fluxes in the Nelson Estuary and NW polynya**. Spatial variability of sea–air CO2 fluxesin (a) the Nelson and Churchill estuaries with the sea-ice cover as of 2 July 2018 and (b) the NW polynya with the sea-ice cover as of 16 June 2018.

**Table S1.** Shipboard and NARR match-up measurements of wind speed, air temperature, and sea–air CO2 fluxes from 31 May to 2 July 2018a.

**Text S1.** Thermal and non-thermal *p*CO2 calculations

**Text S2.** Uncertainties of CO2 flux estimation

**

**

**Figure S1. Sea-ice concentration from daily AMSR2 and weekly CISDA sea-ice products, and ship-recorded observations.** Sea-ice concentration (%) from daily AMSR2 products (blue), weekly CISDA sea-ice products (black), and *in situ* observations recorded by the ship officers (red circles).


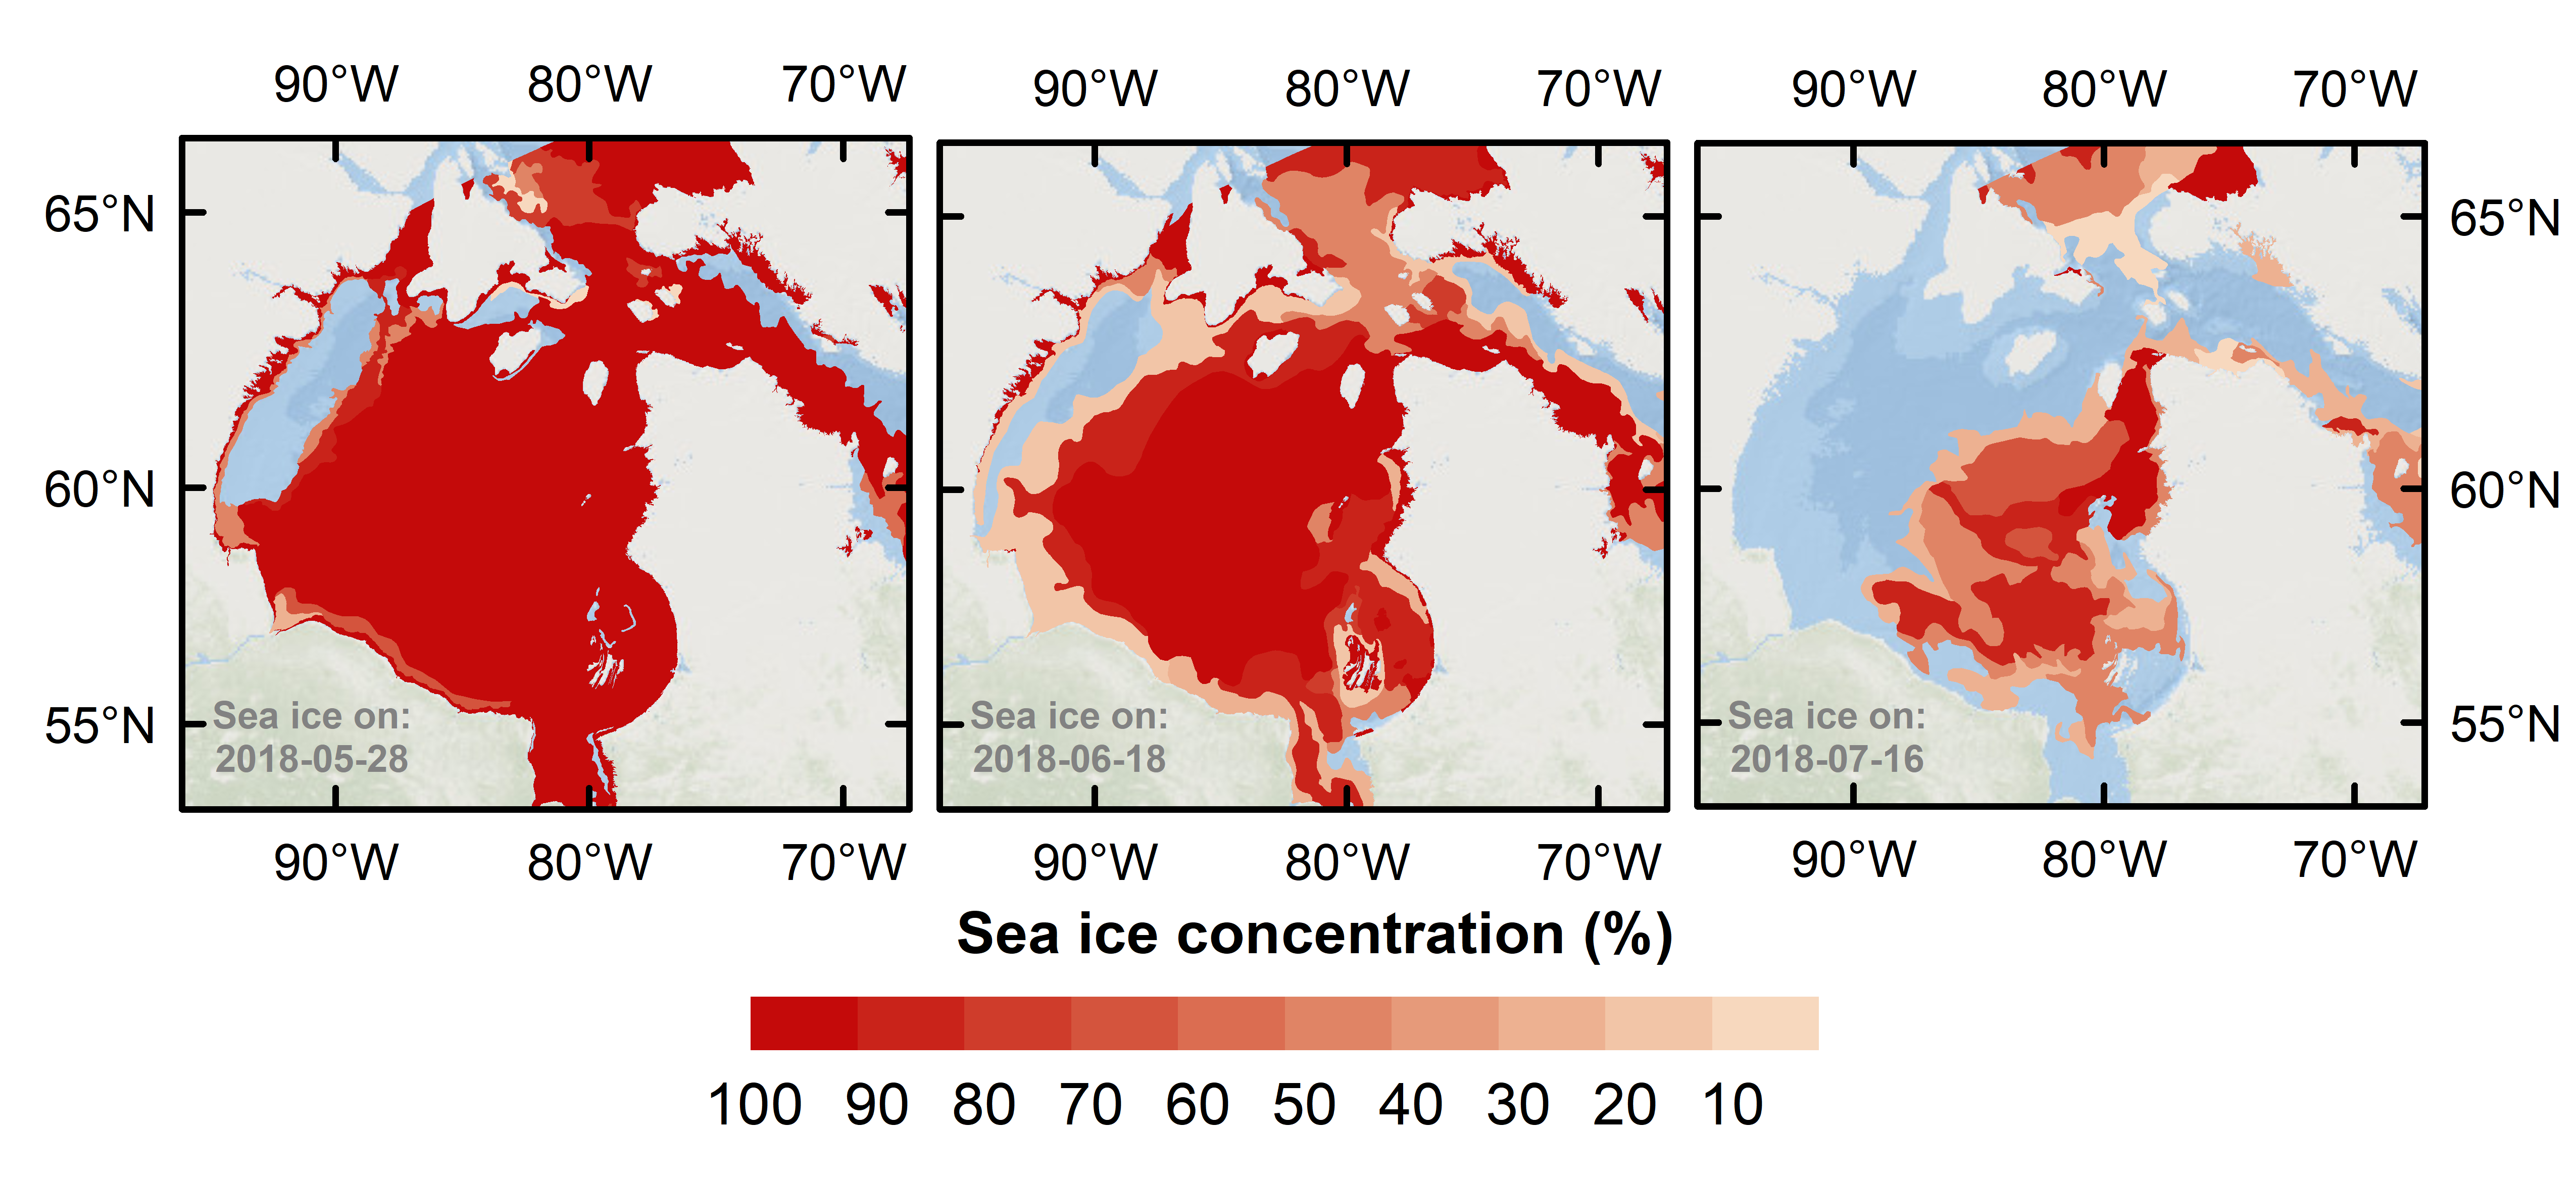


**Figure S2. Regional maps of changes in sea-ice cover over time**. Sea-ice concentration (%, color-coded) at approximately the start (28 May), middle (18 June), and end (16 July) of our cruise in Hudson Bay. Sea-ice concentrations were provided by the Canadian Ice Service. Dates are year-month-day.


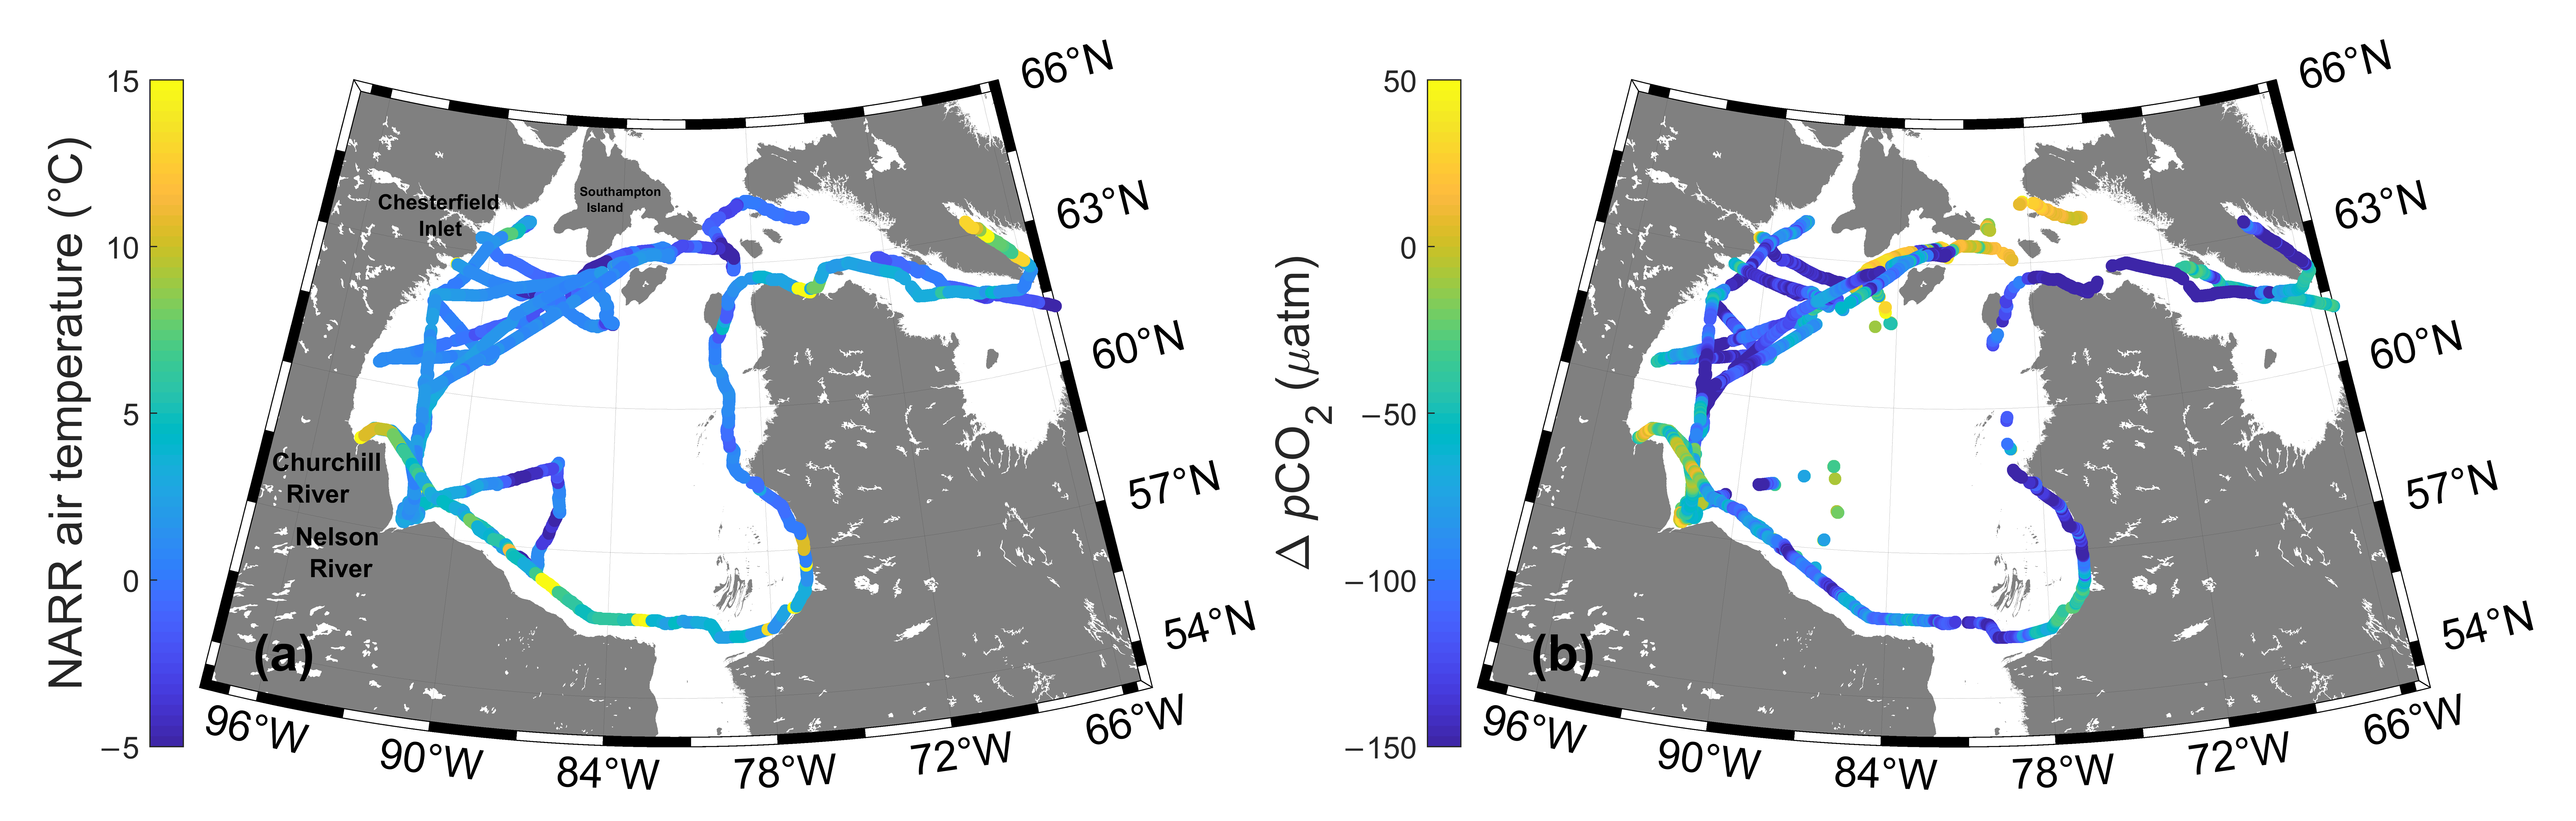


**Figure S3. Air temperature and sea–air CO2 gradient in Hudson Bay.** Spatial variability of (a) NARR air temperature, and (b) the measured sea–air gradient of CO2 partial pressure (∆*p*CO2) during our study time.


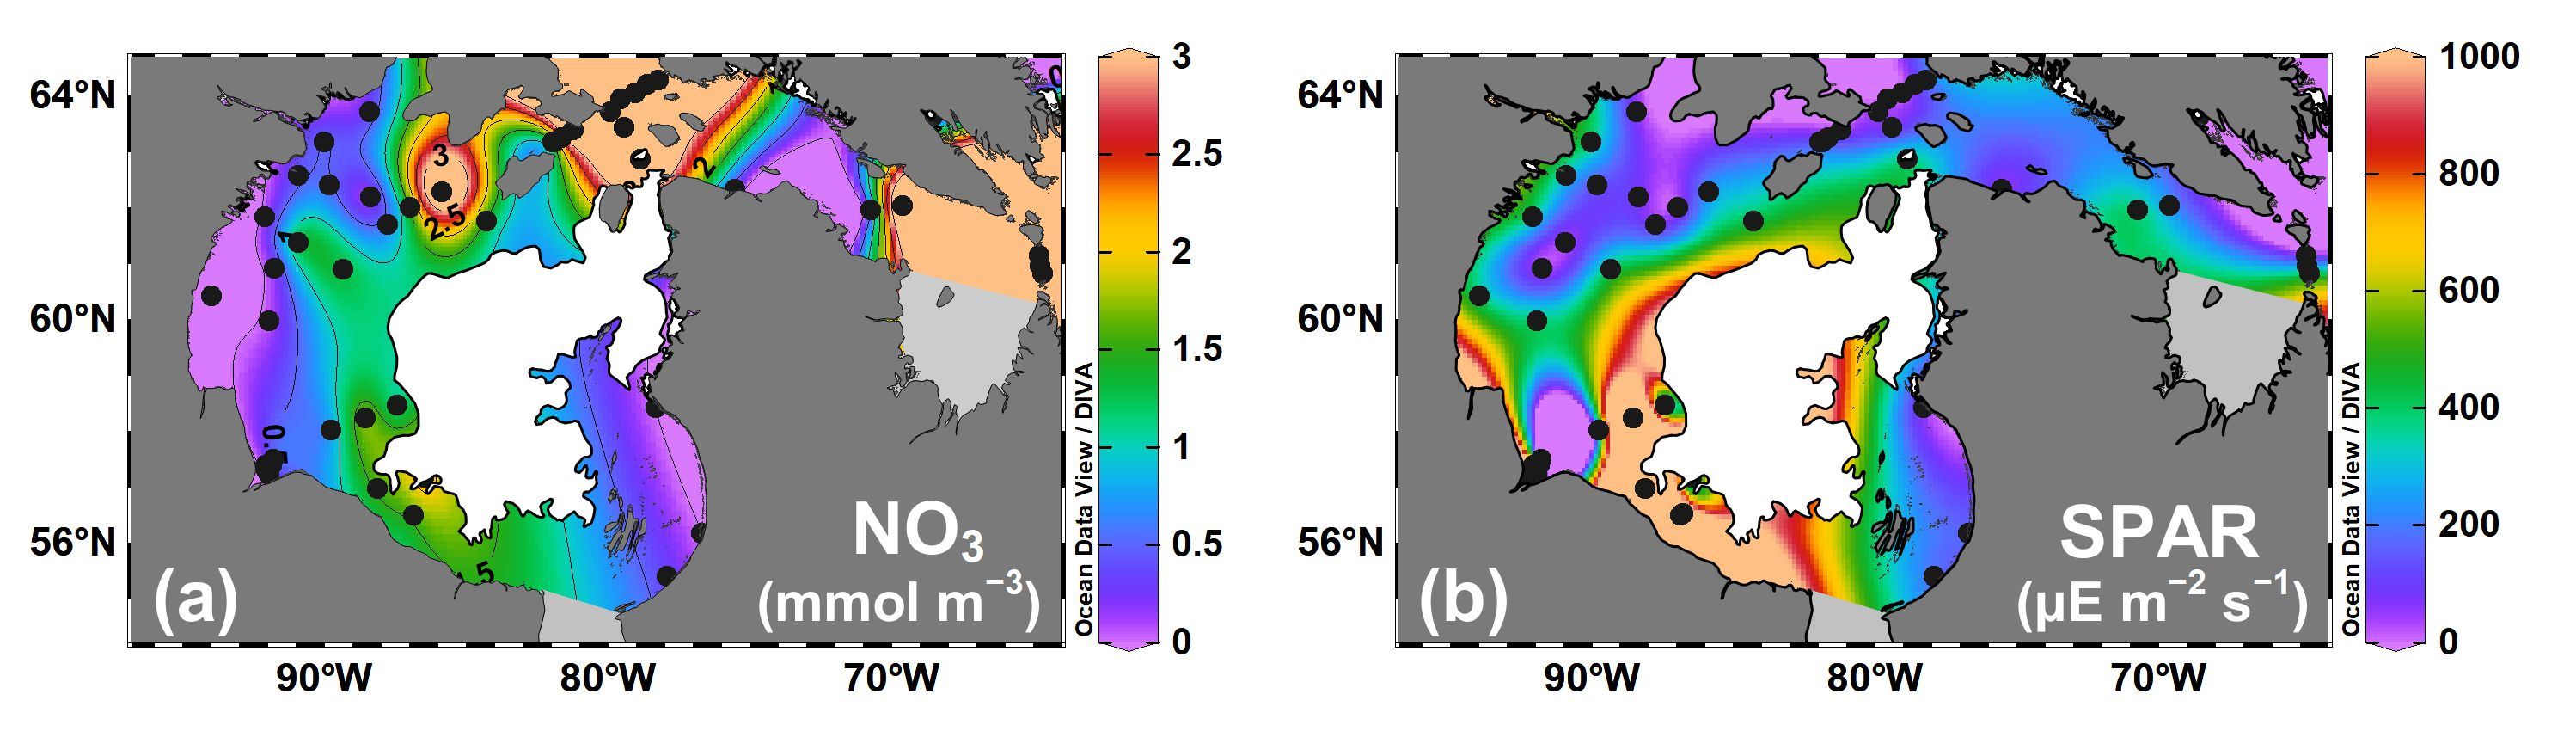


**Figure S4. Nitrate and SPAR variability in Hudson Bay.** Surface distribution of (a) nitrate (NO3) concentrations and (b) surface photosynthetic active radiation (SPAR) across Hudson Bay during our study. The dots indicate locations of CTD casts, and the white area represents sea-ice concentration greater than 90%, as of 9 July 2018, based on weekly ice charts provided by the Canadian Ice Service.


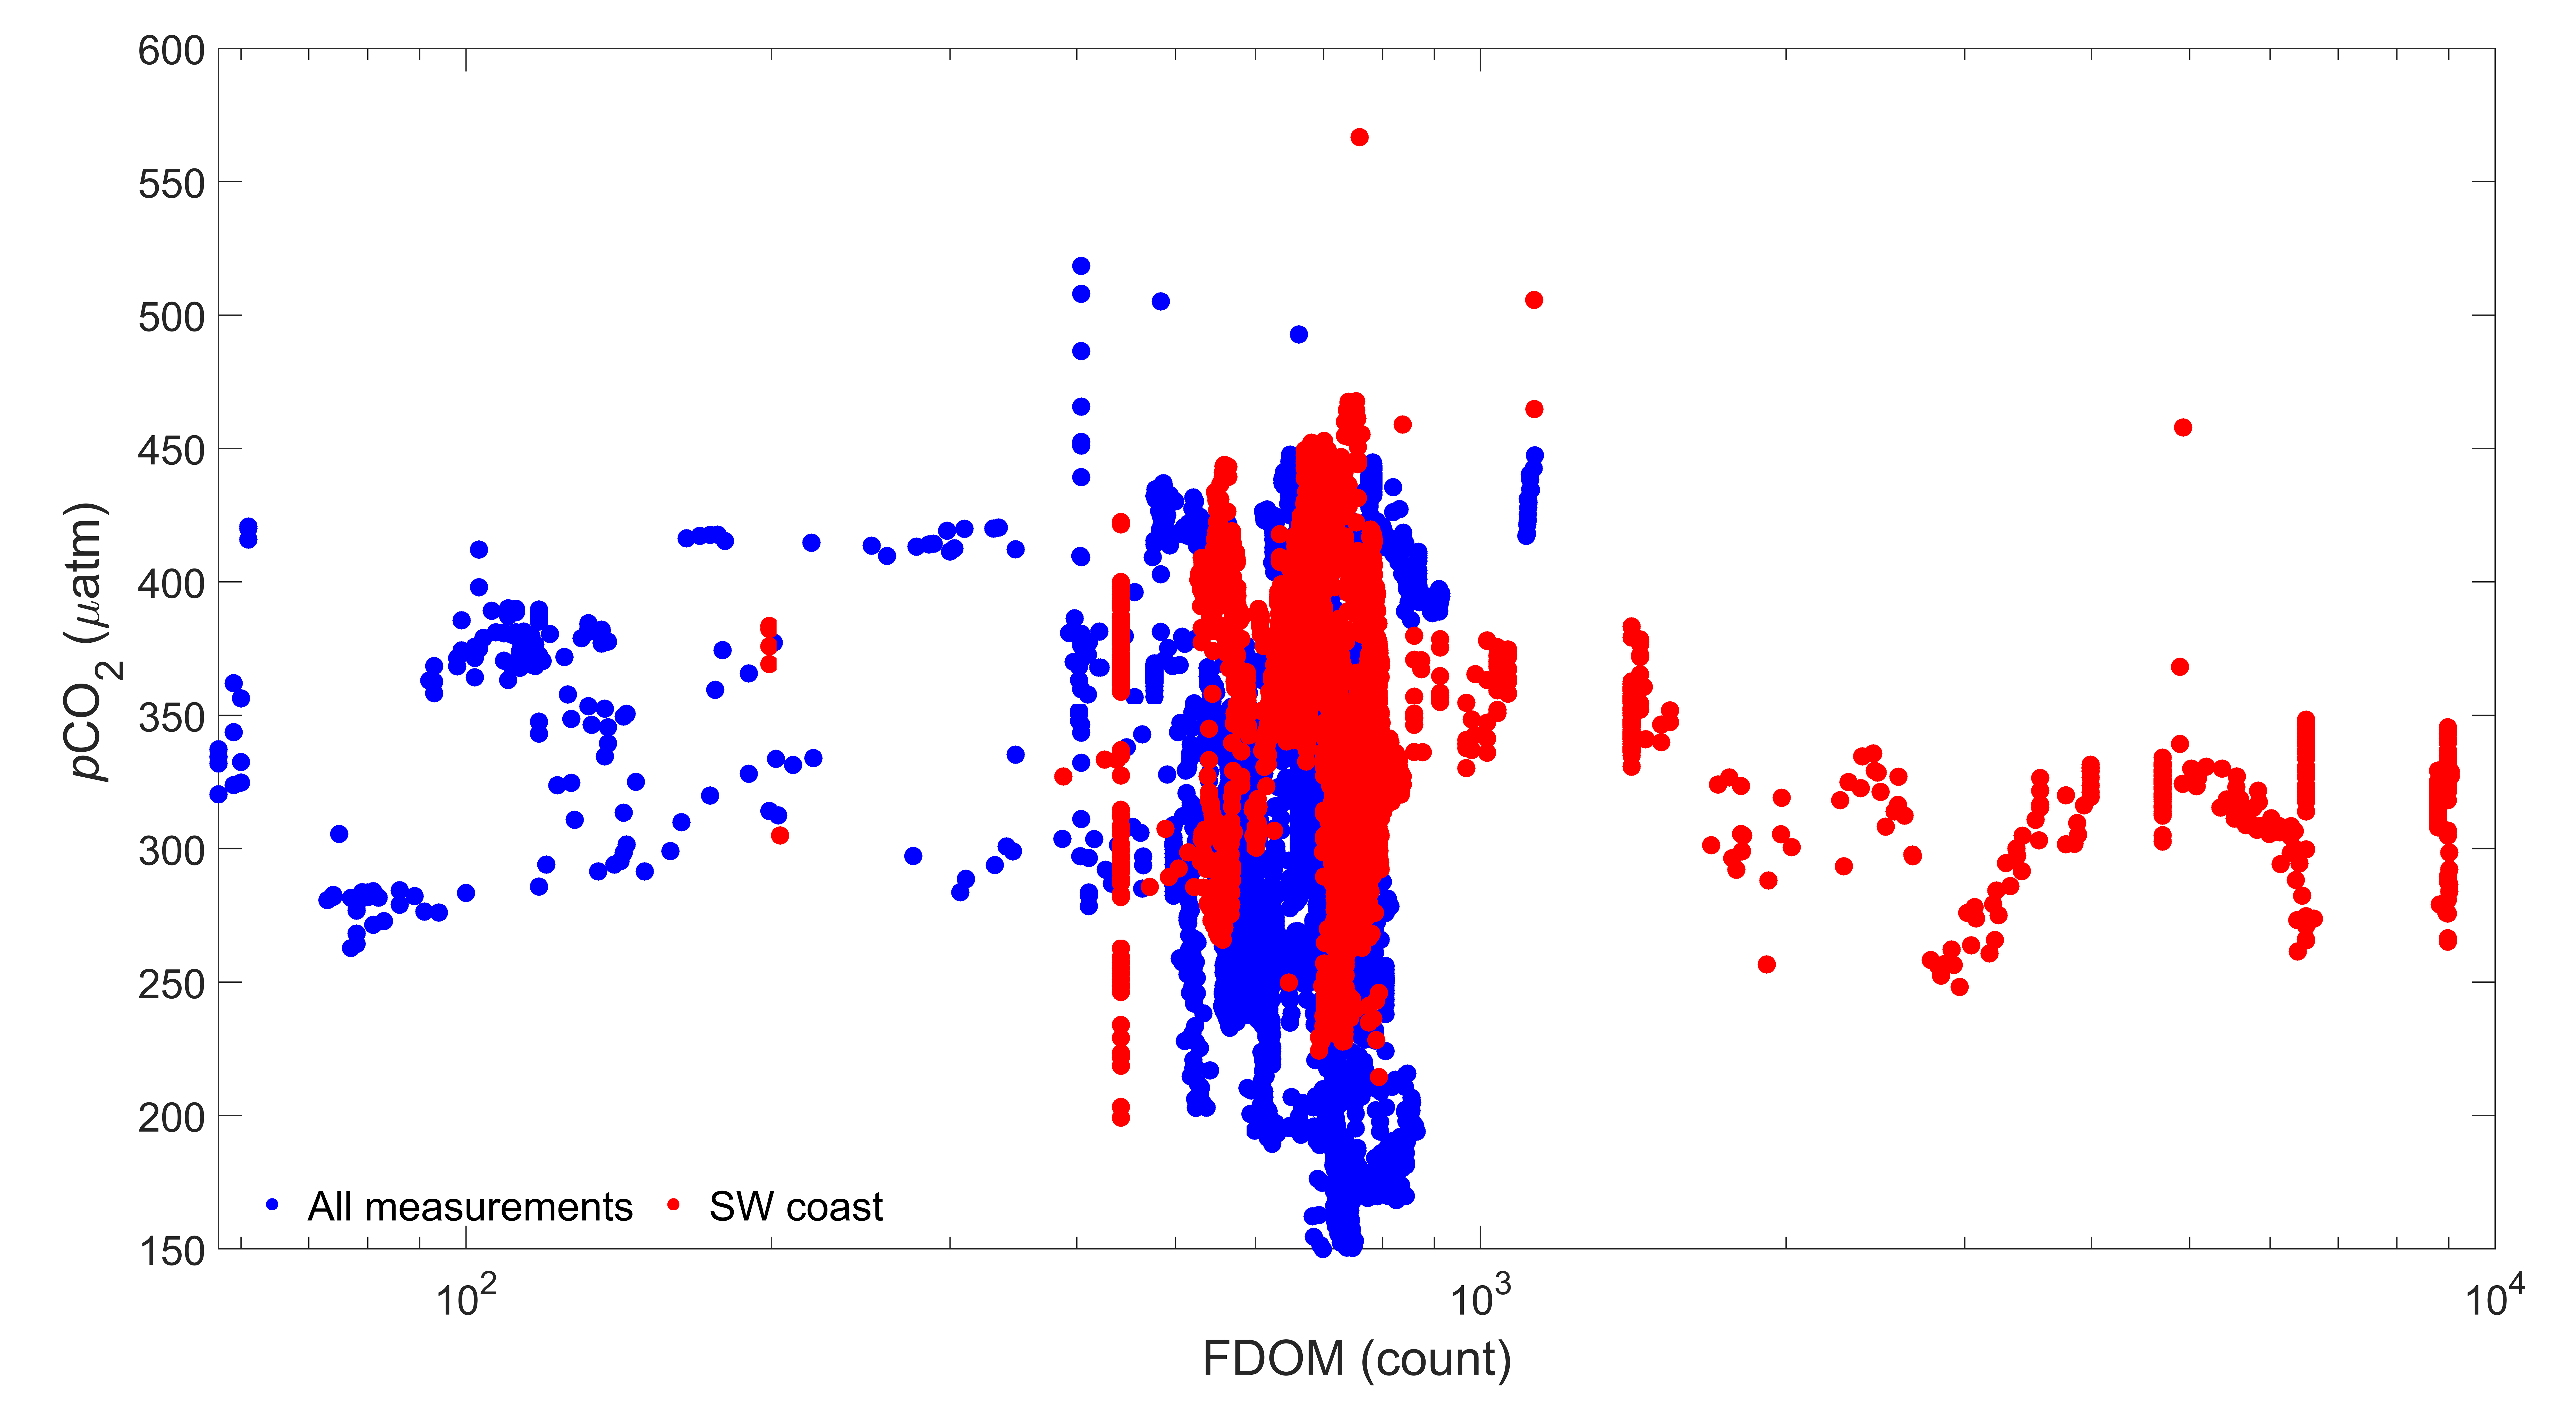


**Figure S5. *p*CO2 versus FDOM.** Scatterplot of *p*CO2 versus fluorescent dissolved organic matter (FDOM) in Hudson Bay during our study, with the measurements from the SW coast in red.


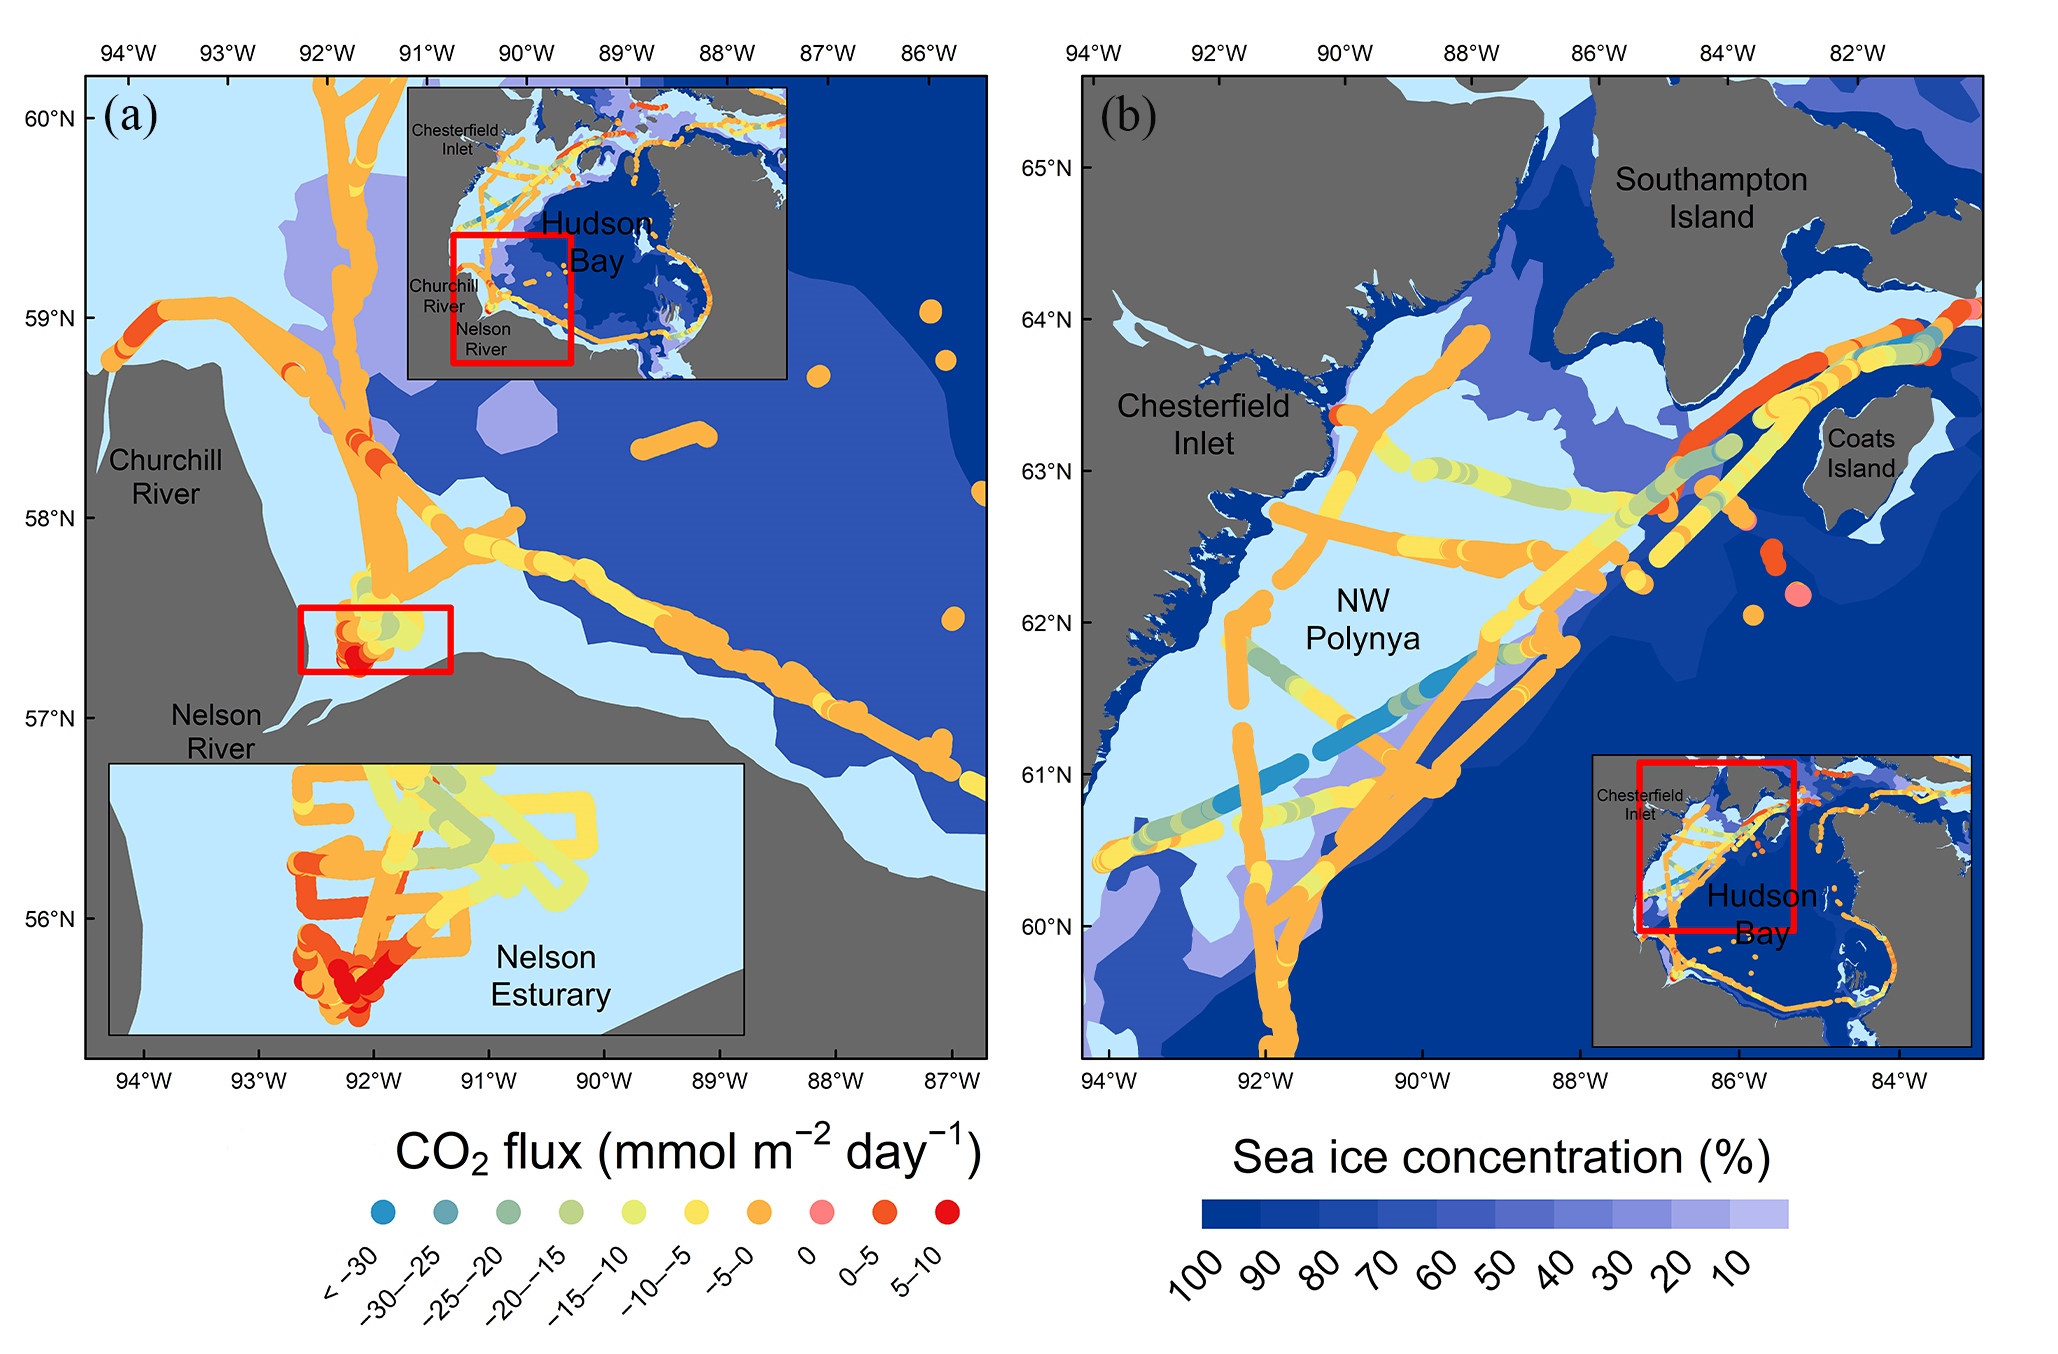


**Figure S6. CO2 fluxes in the Nelson Estuary and NW polynya**. Spatial variability of sea–air CO2 fluxesin (a) the Nelson and Churchill estuaries with the sea-ice cover as of 2 July 2018 and (b) the NW polynya with the sea-ice cover as of 16 June 2018.

**Table S1.** Shipboard and NARR match-up measurements of wind speed, air temperature, and sea-air CO2 fluxes from 31 May to 2 July 2018a.

| Stats | Shipboard wind speed | NARR wind speed | Shipboard air temp. | NARR  air temp. | Shipboard CO2 flux | NARR CO2  flux |
| --- | --- | --- | --- | --- | --- | --- |
| (m s−1) | (m s−1) | (°C) | (°C) | (mmol m−2 day−1) | (mmol m−2 day−1) |
| Mean | 6.1 | 4.7 | 1.7 | 1.0 | −7.8 | −5.8 |
| Standard deviation | 3.1 | 3.1 | 3.1 | 2.6 | 10.3 | 10.5 |
| Minimum | 0.0 | 0.0 | −5.7 | −7.6 | −69.1 | −83.9 |
| Maximum | 15.2 | 15.8 | 21.5 | 20.8 | 13.0 | 8.9 |
| Median | 5.3 | 3.3 | 1.4 | 0.8 | −3.0 | −1.4 |

aThe values presented in this table were area-weighted based on a 1 × 1 km grid across the study area (n = 5580).

**Text S1. Thermal and non-thermal *p*CO2** **calculations**

To separate the temperature effect from non-thermal effects on the observed *p*CO2 values in our study area, we first normalized the *p*CO2 values to the mean temperature of 0.8°C following the approach used by Takahashi et al. (2002):

*p*CO2non-thermal  = *p*CO2obs × , Equation S1

where *p*CO2non-thermal is the temperature-normalized *p*CO2 (or the non-thermal *p*CO2), T is the temperature in °C, and the subscripts “mean” and “obs” refer to the mean and observed values, respectively. Through this approach, the calculated *p*CO2non-thermal represents the non-thermal effect (i.e., biological activity and/or physical water mixing) on the observed *p*CO2 values. To best analyze the effects of temperature on the observed *p*CO2 values (*p*CO2thermal), we used the mean *p*CO2 of 317 μatm with the mean and observed temperatures via the following equation proposed by Takahashi et al. (2002):

*p*CO2thermal  = *p*CO2mean × , Equation S2

Using this method, the calculated *p*CO2thermal shows the *p*CO2 values that would be expected only from temperature changes. Note that we used the seasonal average temperature, not the annual average temperature, as described in Takahashi et al. (2002). As we were mainly interested in the seasonal variability of *p*CO2thermal and *p*CO2non-thermal during our study, we reasoned that using the seasonal average temperature is more appropriate than using the average annual temperature. Also, the temperature during our study covered a greater range (from –1.8°C to around 11°C), which minimizes any seasonal biases on the calculated *p*CO2thermal and *p*CO2non-thermal. That said, using the Takahashi et al. (2002) approach to derive the *p*CO2thermal  and *p*CO2non-thermal in a complex system such as Hudson Bay provides a relatively simple analysis, because it ignores the impact that other physical processes, such as tidal mixing and turbulent forces, might have on *p*CO2 dynamics.

**Text S2. Uncertainties of CO2 flux estimation**

The observed *p*CO2sw measurements include 2% uncertainties associated with the instrument drift and temperature corrections. We calculated a 10% uncertainty in the NARR wind data based on the differences from our in situ field measurements presented in Figure 10. Wanninkhof (2014) estimated the cumulative uncertainties of the CO2 flux derived from the gas exchange parameterization to be 20%. We used an uncertainty of 5% for the AMSR2 sea-ice data, based on the differences from ship observations shown in Figure 2. Loose et al. (2009) estimated the standard error of sea-ice effect on gas exchange to be about 30%. Therefore, the overall uncertainty of the estimated sea–air CO2 fluxes was about 38% ([0.022 + 0.12 + 0.22 + 0.052 + 0.32]1/2), which corresponds to about ± 1.9 mmol CO2 m−2 day−1 of the calculated CO2 fluxes for the spring and early summer seasons.

**Reference**

1. **Loose, B, McGillis, W, Schlosser, P, Perovich, D, Takahashi, T**. 2009. Effects of freezing, growth, and ice cover on gas transport processes in laboratory seawater experiments. *Geophysical Research Letters* **36**(5). DOI: http://dx.doi.org/10.1029/2008gl036318.
